# Supplementary material
Source: publisher figshare collection journal article supplement (https://acs.figshare.com/ndownloader/files/14174234)
Supplement: Supplementary file 1 [file 14174234]

## **Cover sheet-Supporting Information**

**Manuscript title:** “Preparation of Perovskite Films under Liquid Nitrogen Atmosphere for High Efficiency Perovskite Solar Cells”

**List of authors:** Putao Zhang, Fu Yang, Gaurav Kapil, Chi Huey Ng, Tingli Ma, and Shuzi Hayase \*

**Number of pages:** 9 pages (including the cover sheet)

**Number of figures:** 5 figures

**Number of tables:** 2 tables

## Electronic Supplementary Information for

### Preparation of Perovskite Films under Liquid Nitrogen Atmosphere for High Efficiency Perovskite Solar Cells

#### Experimental Section

**Materials.** Unless specified otherwise, all materials were purchased from either Wako or TCI and used as received.

#### Device fabrication.

**Substrate preparation:** Firstly, fluorine doped tin oxide substrates (FTO-coated glass) (Nippon Sheet Glass Co. Ltd.) were cut into squares with dimensions of  $20 \times 20 \text{ mm}^2$  and etched with Zn powder and HCl aqueous (6 M). Then the substrates were washed by ultrasonication with diluted detergent, (10% in water), isopropanol, acetone and deionized water for 20 min, respectively. A 30~50 nm-thick compact layer of  $\text{TiO}_2$  (c- $\text{TiO}_2$ ) was then coated on the substrates by spin coating of a 0.15 mM bis(isopropoxide)bis(acetylacetonato)titanium(IV) solution (75% in 2-propanol, Sigma-Aldrich) in 1-butanol at 2000 rpm for 20 s and then baked on the hotplate at 125 °C for 5 min (thickness of the c- $\text{TiO}_2$  is about 40 nm in this work, see Fig. S1 in supporting information). After cooling down to room temperature, the diluted- $\text{TiO}_2$  paste (30 NRD/ethanol = 1/ 4, weight ratio) was spin-coated on the c- $\text{TiO}_2$  layer at 5000 rpm for 30 s, followed by drying on a hotplate at 125 °C for 10 min, then annealing at 500 °C for 1 h to provide a 150~200 nm-thick mesoporous  $\text{TiO}_2$  (m- $\text{TiO}_2$ ) (in this work thickness of the m- $\text{TiO}_2$  is about 174 nm, see Fig. S2).

**Perovskite precursor solution and film deposition:** Perovskite layer,  $\text{CH}_3\text{NH}_3\text{PbI}_3$ , was formed using one-step anti-solvent method. Perovskite precursor solutions with a concentrations of 1.5 M were prepared by dissolving Methylammonium iodide (MAI) and lead iodide ( $\text{PbI}_2$ ) (MAI/ $\text{PbI}_2$  = 1:1.05, molar ratio) in a mixture solution of N, N-dimethylformide (DMF) and dimethyl sulfoxide (DMSO) (DMF/DMSO = 4/1, volume ratio) and stirring at room temperature for 1 hour. To prepare light harvesting layer, the perovskite solution (50  $\mu\text{L}$ ) was first dropped onto a  $\text{TiO}_2$ /FTO substrate. The substrate was then spun at 4000 rpm for 25 s, and during the 10<sup>th</sup> seconds 500  $\mu\text{L}$  of anhydrous ethyl acetate was quickly dropped on the spinning substrate. The obtained films were then annealed at 100 °C for 10 min in air environment. For the preparation of perovskite film by LN method, as shown in Fig. S3 b, two stainless steel petri dishes (5cm in diameter and 1.5cm in depth) filled with liquid nitrogen (~20 mL) were placed under the spinner before spin coating.

**Hole transporting layer and Au electrode:** A 50  $\mu\text{L}$  of Spiro-OMeTAD solution was spin-coated on the top of perovskite layer at 4000 rpm for 30 s. The Spiro-OMeTAD solution was prepared by dissolving 72.3 mg of Spiro-OMeTAD in 1 mL of chlorobenzene, to which 28.8  $\mu\text{L}$  of 4-tert-butyl pyridine (4-tBP) and 17.5  $\mu\text{L}$  of lithium bis(trifluoromethanesulfonyl)imide (Li-TFSI) (520 mg Li-TFSI in 1 mL acetonitrile) were added. Finally, an 80-nm-thick of Au was thermally evaporated

on the Spiro-OMeTAD-coated film. Note that the samples were left in a desiccator overnight before the gold electrode was prepared.

### **Film and device characterization**

The thickness of the TiO<sub>2</sub> layer were measured using a Veeco Dektak 150 surface profilometer. A field-emission scanning electron microscope (FE-SEM, Jeol JSM 6700F) was used to investigate the morphology of the perovskite film top view and the device cross section. Absorption spectral measurements were recorded using Shimadzu UV-2550 UV-visible spectrophotometer. A solar simulator (KHP-1, Bunko-Keiki, Japan) fitted with a filtered 1000 W xenon lamp was used to provide simulated solar irradiation (AM1.5, 100 mW·cm<sup>-2</sup>). Illumination intensity of the solar simulator was confirmed by a standard silicon reference cell (BS-520 S/N 007, Bunko-Keiki, Japan). Current-voltage (J-V) characteristics were measured using a Keithley 2400 source meter. The solar cells were masked with a non-reflective metal aperture of 0.1 cm<sup>2</sup> to define the working area of the device and avoid light scattering through the edges. Incident photon to current efficiency (IPCE) spectra were recorded using a 150 W xenon lamp (KHP-1, Bunko-Keiki, Japan) fitted with a monochromator (Cornerstone 260) as a monochromatic light source. IPCE photocurrents were recorded under short-circuit conditions using the Keithley 2400 source meter.

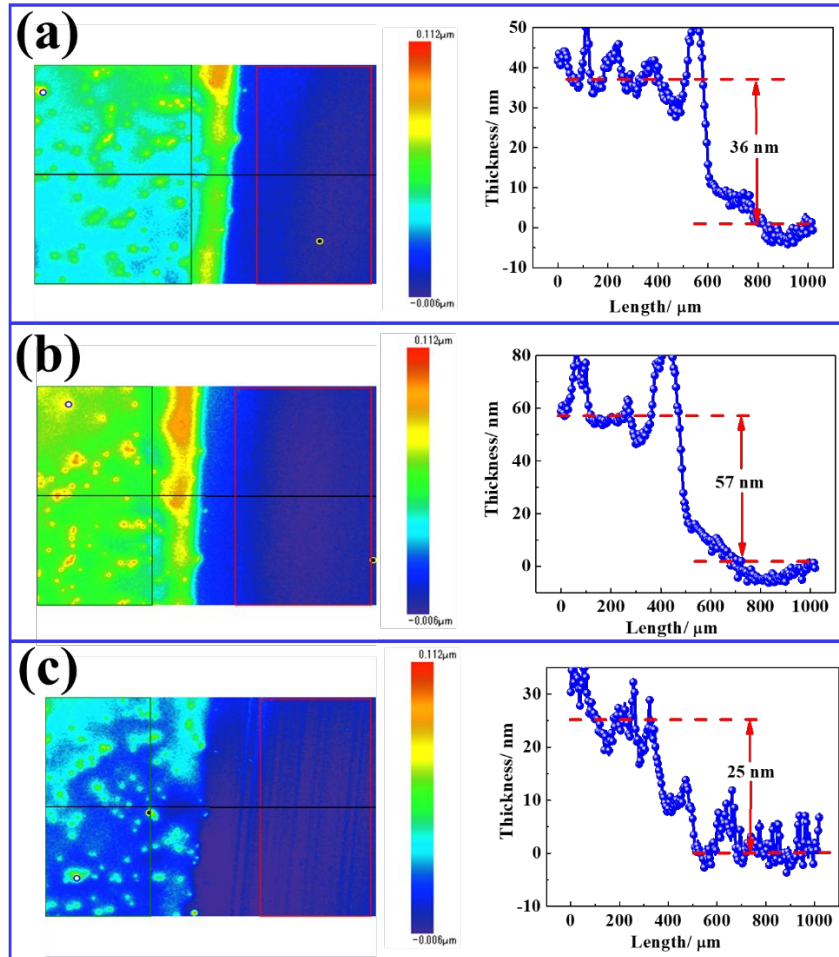

**Fig. S1** Thickness of  $\text{TiO}_2$  compact layer (c- $\text{TiO}_2$ ) on FTO glass. (a) 36 nm, (b) 57 nm, (c) 25 nm. The c- $\text{TiO}_2$  were prepared by spin-coating method, in detail 0.15 M titanium diisopropoxide bis (acetylacetonate) (75 wt% in isopropanol, Sigma-Aldrich) in 1-butanol (99.8%, Sigma-Aldrich) solution was spin-coated on an FTO substrate at 2000 rpm for 20 s, which was followed by heating on a hotplate at 125 °C for 5 min. Three samples were randomly selected with an average thickness of 39 nm  $((36+57+25)/3=39$  nm).

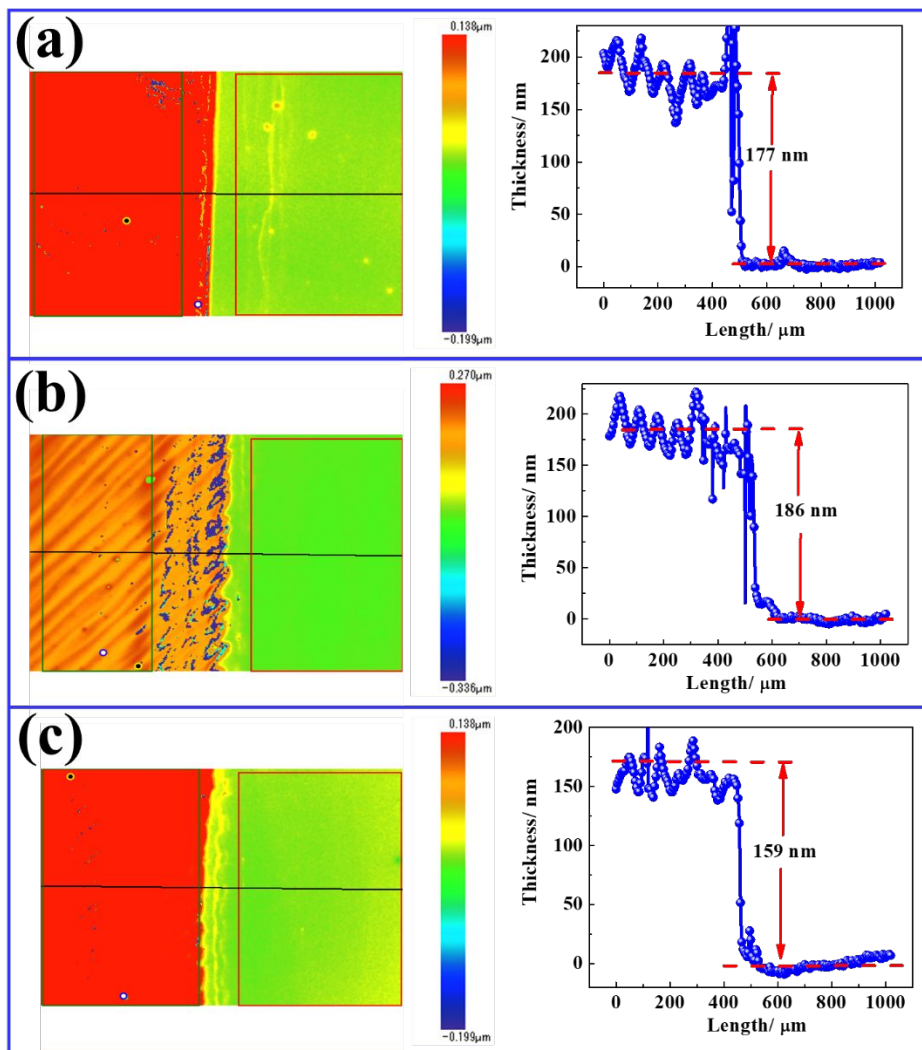

Fig. S2 Thickness of mesoporous  $\text{TiO}_2$  layer (m- $\text{TiO}_2$ ) on FTO/c- $\text{TiO}_2$ . (a) 177 nm, (b) 186 nm, (c) 159 nm. In detail the diluted- $\text{TiO}_2$  paste was spin-coated on the c- $\text{TiO}_2$  layer at 5000 rpm for 30 s, where the paste (Dyesol, 30 NR-D) was diluted in ethanol ( $\text{TiO}_2$  paste/ethanol = 1/4, weight ratio). After drying on a hotplate at 125 °C for 5 min, the film was annealed at 500 °C for 1 h, providing m- $\text{TiO}_2$  with thickness of about 174 nm. Three samples were randomly selected.  $((177+186+159)/3=174 \text{ nm})$ .

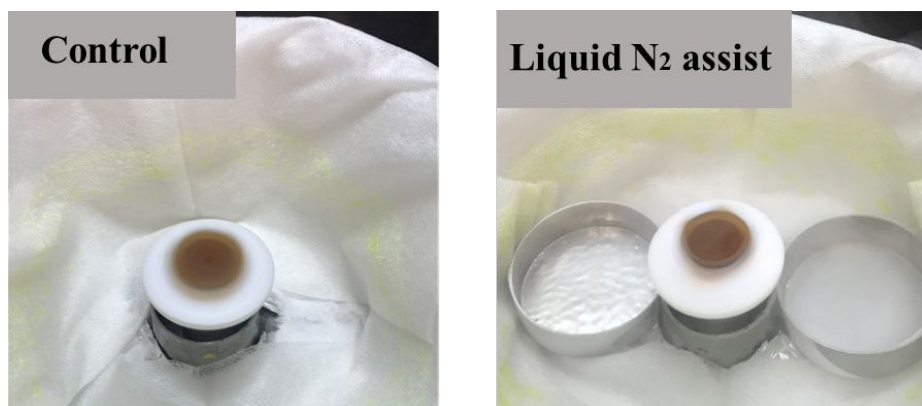

Fig. S3 One-step anti-solvent method for preparing perovskite films. (a) Conventional process and (b) liquid nitrogen assist process, the ambient temperature is about 23 °C and the temperature during spin-coating was about 4 °C.

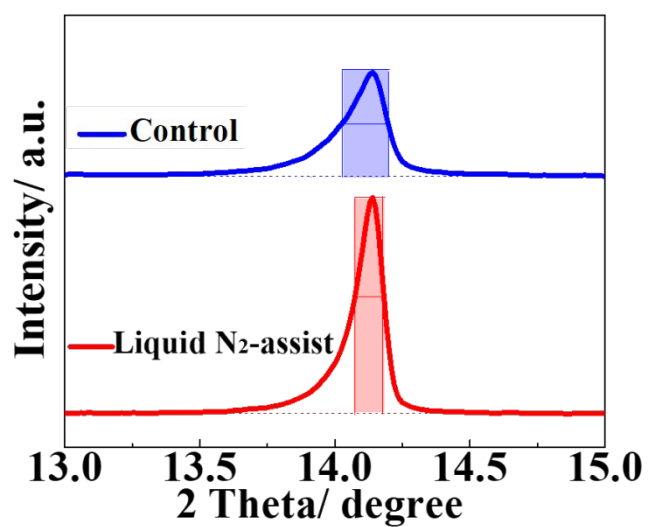

Fig. S4 X-ray diffraction spectra of  $\text{CH}_3\text{NH}_3\text{PbI}_3$  perovskite films prepared by conventional process and liquid nitrogen assisted process. The full width at half maximum (FWHM) of peak at  $14.17^\circ$ .

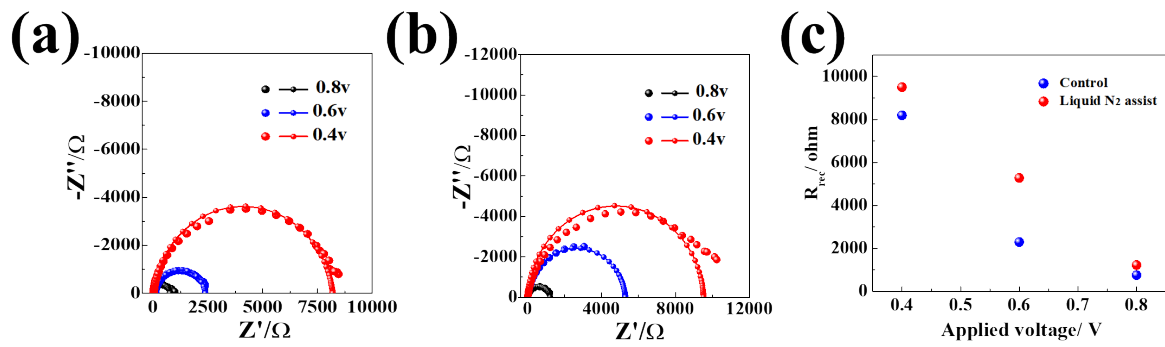

Fig. S5 Nyquist plots of perovskite solar cells based on  $\text{CH}_3\text{NH}_3\text{PbI}_3$  measured in dark condition with different applied bias (0.4, 0.6 and 0.8 V). (a) Control group and (b) liquid nitrogen assisted group. (c) Charge recombination ( $R_{rec}$ ) resistance extracted from EIS measurements at different applied bias.

Tab. S1. Photovoltaic parameters for thirty perovskite solar cells of control group.

| Device # | $J_{sc} / \text{mAcm}^{-2}$ | $V_{oc} / \text{V}$ | FF     | PCE /%  |
|----------|-----------------------------|---------------------|--------|---------|
| 1        | 21.549                      | 1.028               | 0.655  | 14.506  |
| 2        | 21.62                       | 1.016               | 0.643  | 14.13   |
| 3        | 20.4                        | 1.019               | 0.706  | 14.68   |
| 4        | 21.687                      | 1.031               | 0.699  | 15.632  |
| 5        | 21.322                      | 1.047               | 0.638  | 14.247  |
| 6        | 21.429                      | 1.042               | 0.647  | 14.453  |
| 7        | 21.269                      | 1.055               | 0.683  | 15.328  |
| 8        | 18.781                      | 1.055               | 0.738  | 14.626  |
| 9        | 21.491                      | 1.024               | 0.667  | 14.695  |
| 10       | 21.775                      | 1.05                | 0.674  | 15.45   |
| 11       | 21.682                      | 1.008               | 0.699  | 15.292  |
| 12       | 21.59                       | 1.007               | 0.676  | 14.72   |
| 13       | 20.799                      | 1.043               | 0.653  | 14.175  |
| 14       | 20.391                      | 1.049               | 0.658  | 14.077  |
| 15       | 18.861                      | 1.055               | 0.736  | 14.659  |
| 16       | 21.231                      | 1.034               | 0.653  | 14.32   |
| 17       | 21.079                      | 1.021               | 0.68   | 14.641  |
| 18       | 21.39                       | 1.014               | 0.656  | 14.23   |
| 19       | 19.587                      | 1.055               | 0.652  | 13.482  |
| 20       | 21.674                      | 0.98                | 0.685  | 14.539  |
| 21       | 21.1                        | 1.002               | 0.668  | 14.12   |
| 22       | 19.807                      | 1.033               | 0.698  | 14.277  |
| 23       | 20.99                       | 1.006               | 0.66   | 13.93   |
| 24       | 18.941                      | 1.021               | 0.733  | 14.686  |
| 25       | 20.761                      | 1.041               | 0.659  | 14.252  |
| 26       | 21.346                      | 1.023               | 0.668  | 14.6    |
| 27       | 21.194                      | 1.043               | 0.647  | 14.299  |
| 28       | 21.113                      | 1.055               | 0.657  | 14.64   |
| 29       | 20.168                      | 1.007               | 0.663  | 13.478  |
| 30       | 21.294                      | 1.051               | 0.663  | 14.835  |
| Average  | 20.877±                     | 1.030±              | 0.673± | 14.499± |
|          | 0.863                       | 0.019               | 0.027  | 0.488   |



Tab. S2. Photovoltaic parameters for thirty perovskite solar cells prepared by LN method.

| Device #       | $J_{sc} / \text{mAcm}^{-2}$ | $V_{oc} / \text{V}$ | FF              | PCE /%           |
|----------------|-----------------------------|---------------------|-----------------|------------------|
| 1              | 20.284                      | 1.062               | 0.731           | 15.745           |
| 2              | 19.679                      | 1.038               | 0.738           | 15.077           |
| 3              | 22.127                      | 1.059               | 0.692           | 16.216           |
| 4              | 19.814                      | 1.057               | 0.737           | 15.426           |
| 5              | 21.599                      | 1.055               | 0.719           | 16.38            |
| 6              | 20.235                      | 1.067               | 0.695           | 15.007           |
| 7              | 21.503                      | 1.052               | 0.719           | 16.277           |
| 8              | 21.594                      | 1.054               | 0.684           | 15.566           |
| 9              | 20.13                       | 1.062               | 0.735           | 15.698           |
| 10             | 22.29                       | 1.024               | 0.639           | 14.6             |
| 11             | 22.194                      | 1.058               | 0.704           | 16.532           |
| 12             | 19.907                      | 1.056               | 0.735           | 15.454           |
| 13             | 20.373                      | 1.064               | 0.723           | 15.664           |
| 14             | 21.989                      | 1.048               | 0.663           | 15.28            |
| 15             | 21.73                       | 1.058               | 0.679           | 15.619           |
| 16             | 21.793                      | 1.057               | 0.717           | 16.523           |
| 17             | 21.278                      | 1.05                | 0.722           | 16.139           |
| 18             | 22.545                      | 0.985               | 0.633           | 14.051           |
| 19             | 22.603                      | 1.018               | 0.656           | 15.098           |
| 20             | 21.186                      | 1.049               | 0.723           | 16.071           |
| 21             | 19.947                      | 1.058               | 0.736           | 15.546           |
| 22             | 20.482                      | 1.038               | 0.673           | 14.311           |
| 23             | 19.987                      | 1.058               | 0.731           | 15.467           |
| 24             | 21.992                      | 1.061               | 0.678           | 15.826           |
| 25             | 21.515                      | 1.056               | 0.674           | 15.3             |
| 26             | 19.713                      | 1.056               | 0.725           | 15.102           |
| 27             | 20.549                      | 1.069               | 0.722           | 15.852           |
| 28             | 21.148                      | 1.087               | 0.692           | 15.911           |
| 29             | 22.752                      | 1.037               | 0.648           | 15.288           |
| 30             | 21.816                      | 1.039               | 0.665           | 15.071           |
| <b>Average</b> | 21.158±<br>0.959            | 1.051±<br>0.018     | 0.700±<br>0.032 | 15.536±<br>0.595 |
